# Supplementary material for: Transformation process of ice crystallized from a glassy dilute trehalose aqueous solution
Source: Royal Society of Chemistry journal article supplement (doi:10.1039/d2cp02712g), 2022-01-01
Supplement: d2cp02712g1.pdf [file d2cp02712g1.pdf]

## Supplementary Materials

# Transformation process of ice crystallized from a glassy dilute trehalose aqueous solution.

*Yoshiharu Suzuki \* and Satoshi Takeya*

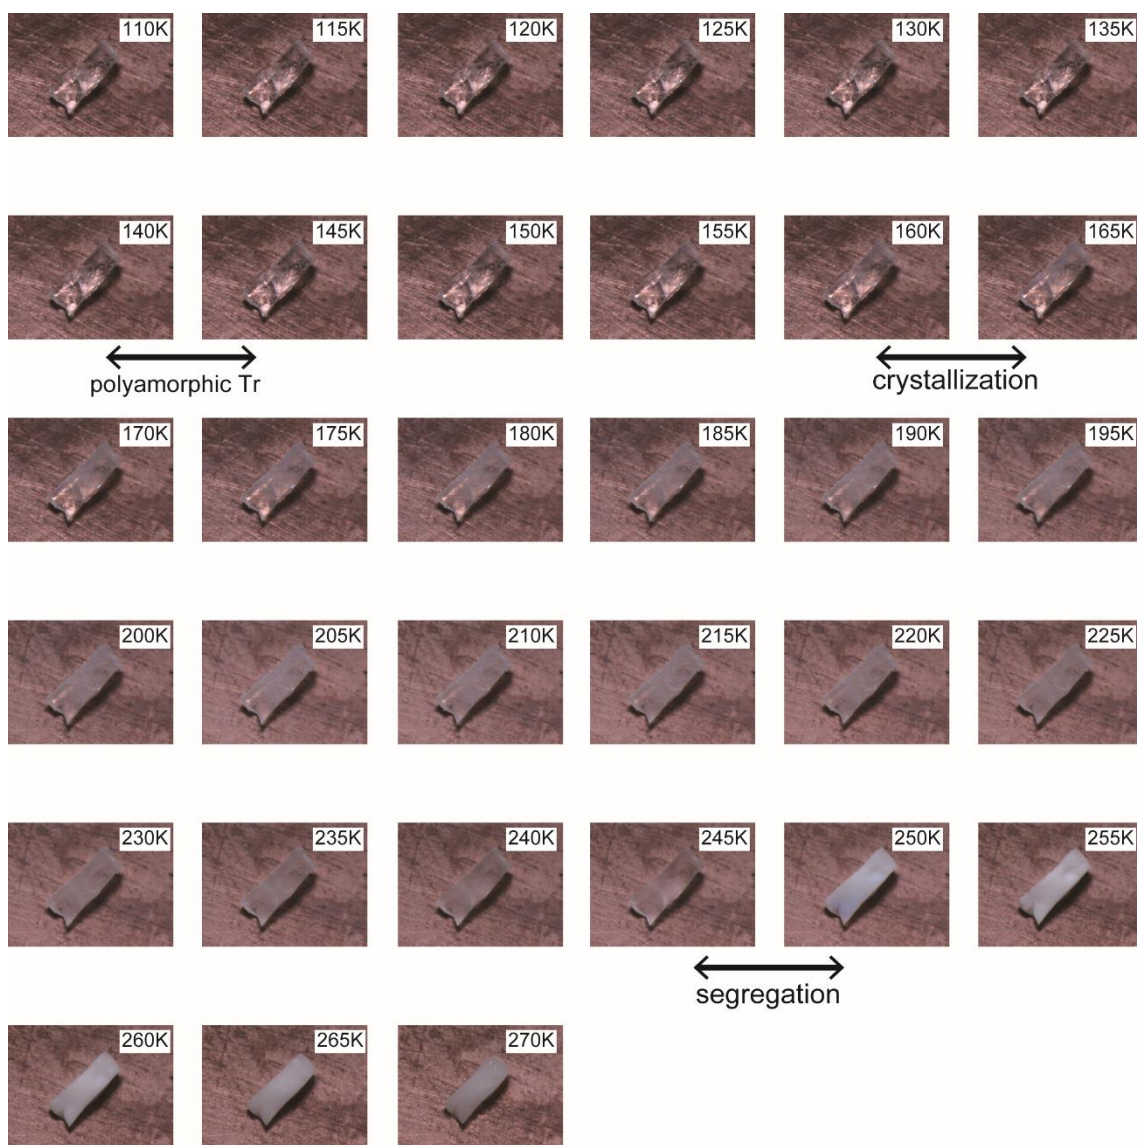

**Fig. S1:** Appearance Change in the TRaq solution ( $x = 0.023$ ) by heating from 77 to 270 K under dry  $N_2$ -gas atmosphere at ambient pressure. The appearance was observed using a stereoscopic microscope. The heating rate is about 4 K/min. The size of the sample is  $\sim 3$  to 5 mm in length. The sample is placed on a Cu plate.

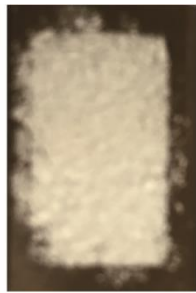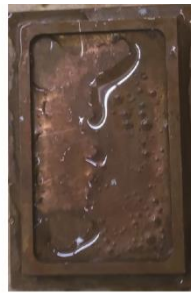

(a) under vacuum  
0.1Pa

(b) N<sub>2</sub>-gas purge  
0.1MPa

**Fig. S2:** Appearances of sample recovered after the PXRD measurement at 278 K. (a) The recovered sample of the PXRD measurement under vacuum (0.1 Pa). (b) The recovered sample of the PXRD measurement at ambient pressure (0.1 MPa).
